# Supplementary material for: Bottom-up preparation of MgH2 nanoparticles with enhanced cycle life stability during electrochemical conversion in Li-ion batteries
Source: Royal Society of Chemistry journal article supplement (doi:10.1039/c4nr03444a), 2014-01-01
Supplement: c4nr03444a1.pdf [file c4nr03444a1.pdf]

## Supplementary information

### Bottom-up preparation of MgH<sub>2</sub> nanoparticles with enhanced cycle life stability during electrochemical conversion in Li-ion batteries

Yassine Oumellal<sup>a</sup>, Claudia Zlotea<sup>\*a</sup>, Stéphane Bastide<sup>a</sup>, Christine Cachet-Vivier<sup>a</sup>, Eric Léonel<sup>a</sup>, Stéphane Sengmany<sup>a</sup>, Eric Leroy<sup>a</sup>, Luc Aymard<sup>b</sup>, Jean-Pierre Bonnet<sup>b</sup>, Michel Latroche<sup>a</sup>

<sup>a</sup>Institut de Chimie et des Matériaux Paris-Est, CNRS UPEC UMR 7182, 2-8 rue Henri Dunant, 94320 Thiais, France

<sup>b</sup>Laboratoire de Réactivité et Chimie des Solides, CNRS UPJL, UMR 7314, 33 rue Saint Leu 80039 Amiens, France

Content of the supplementary information:

- (a) Dark field TEM image and the corresponding SAED electron diffraction pattern of the as-synthesized 15MgH<sub>2</sub>@HSAG-500,
- (b) N<sub>2</sub> sorption isotherms at 77 K of all as-synthesized xMgH<sub>2</sub>@HSAG-500 composites,
- (c) N<sub>2</sub> sorption isotherms at 77 K of 50MgH<sub>2</sub>@HSAG-500 composite before and after ball milling,
- (d) Electrochemical characterizations of all as-synthesized xMgH<sub>2</sub>@HSAG-500 composites for the first cycle, where x is 15, 25, 50 and 70 wt.% Mg.
- (e) Comparison between capacities of two ball milled xMgH<sub>2</sub>@HSAG-500 composites with x = 50 and 70 wt.% Mg,
- (f) Electrochemical characterization of the pristine HSAG-500 carbon.

a) The dark field TEM image and the corresponding SAED electron diffraction pattern of the as-synthesized  $15\text{MgH}_2@\text{HSAG-500}$  composite

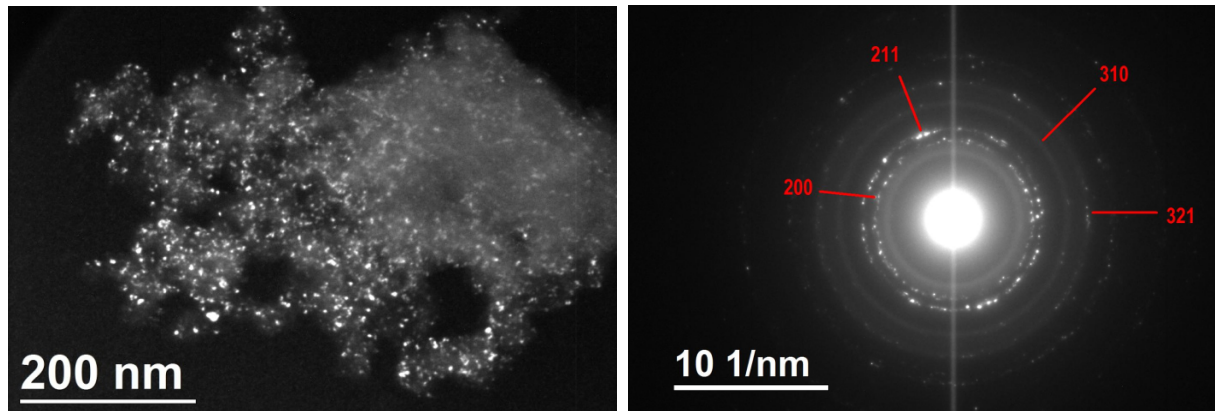

Figure SI-1. The dark field TEM image (left) and the corresponding SAED (right) of the as-synthesized  $15\text{MgH}_2@\text{HSAG-500}$  composite.

All the diffraction spots in the SAED pattern are indexed in the tetragonal structure of the  $\text{MgH}_2$  phase (JCP: 01-074-0934). Attempts have been done to index in the following structures: the cubic  $\text{MgO}$  (JCP: 3-0998) and the hexagonal  $\text{Mg}$  (JCP: 4-0770). Neither the cubic  $\text{MgO}$  nor the hexagonal  $\text{Mg}$  structures fits the diffraction spots observed presently. Therefore, neither decomposition nor oxidation occurs during TEM measurements.

b)  $N_2$  sorption isotherms at 77 K of all as-synthesized  $xMgH_2@HSAG-500$  composites, where  $x$  is 15, 25, 50 and 70 wt.% Mg

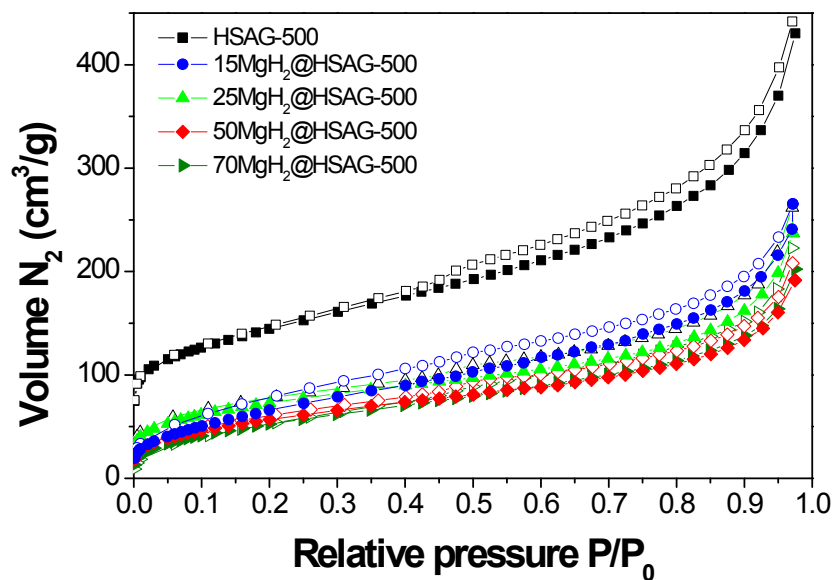

Figure SI-2.  $N_2$  sorption isotherms at 77 K for all  $xMgH_2@HSAG-500$  composites. Full and empty symbols stand for adsorption and desorption, respectively.

c)  $N_2$  sorption isotherms at 77 K and pore size distribution of  $50MgH_2@HSAG-500$  composite before and after ball milling

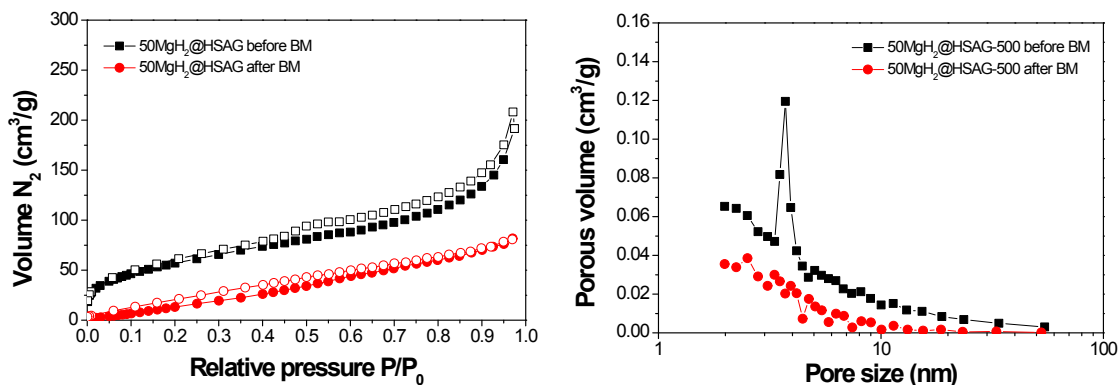

Figure SI-3.  $N_2$  sorption isotherms at 77 K (left) and pore size distribution of  $50MgH_2@HSAG-500$  composite (right) before and after ball milling. Full and empty symbols stand for adsorption and desorption, respectively.

The ball milling strongly decreases the textural properties of the composite  $50MgH_2@HSAG-500$ . This composite shows almost negligible microporosity (see also Table 1). The pore size distribution, as determined by Barrett-Joyner-Halenda analysis on the desorption branch, reveals a strong decrease of porosity.

d) Electrochemical characterizations of all as-synthesized  $x\text{MgH}_2@\text{HSAG-500}$  composites during the first cycle ( $x$  is 15, 25, 50 and 70 wt.% Mg)

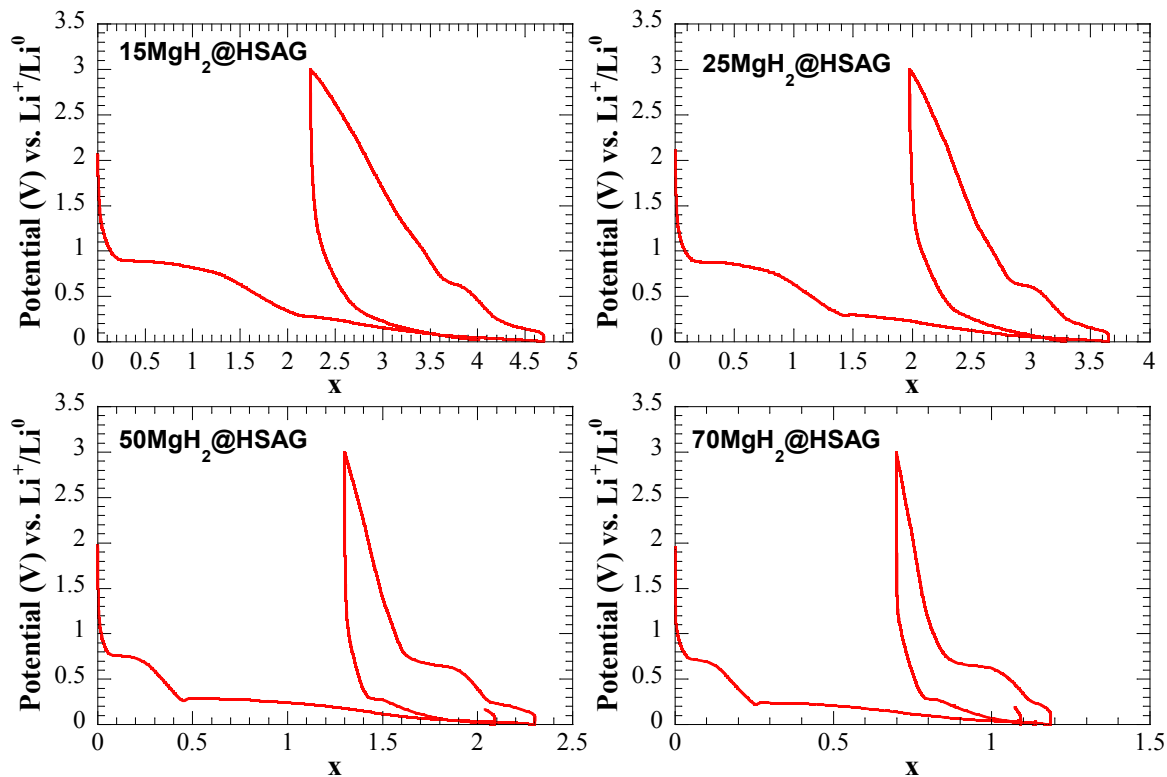

Figure SI-4. Potential/composition profiles of all as-synthesized  $x\text{MgH}_2@\text{HSAG-500}$  composites with  $x = 15, 25, 50$  and  $70$  wt.% Mg.

e) Comparison between capacities of two ball milled composites  $x\text{MgH}_2@\text{HSAG-500}$  with  $x = 50$  and  $70$  wt.% Mg over 10 cycles.

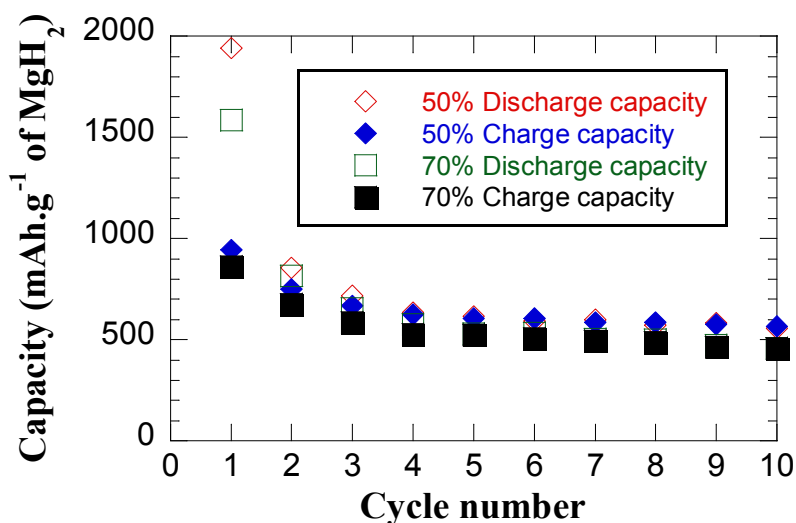

Figure SI-5. The variation of capacity of two ball milled composites  $x\text{MgH}_2@\text{HSAG-500}$  with  $x = 50$  and  $70$  wt.% Mg over 10 cycles.

These two composites with different carbon content have been prepared in the same way (bottom-up synthesis followed by ball milling under Ar for 10 h). The overall capacity expressed by gram of  $\text{MgH}_2$  is comparable over 10 cycles. This suggests that the carbon contribution is negligible for these composites and supports our hypothesis of the calculation of the overall capacity relative to solely  $\text{MgH}_2$  content.

f) Electrochemical characterization of pristine HSAG-500 carbon

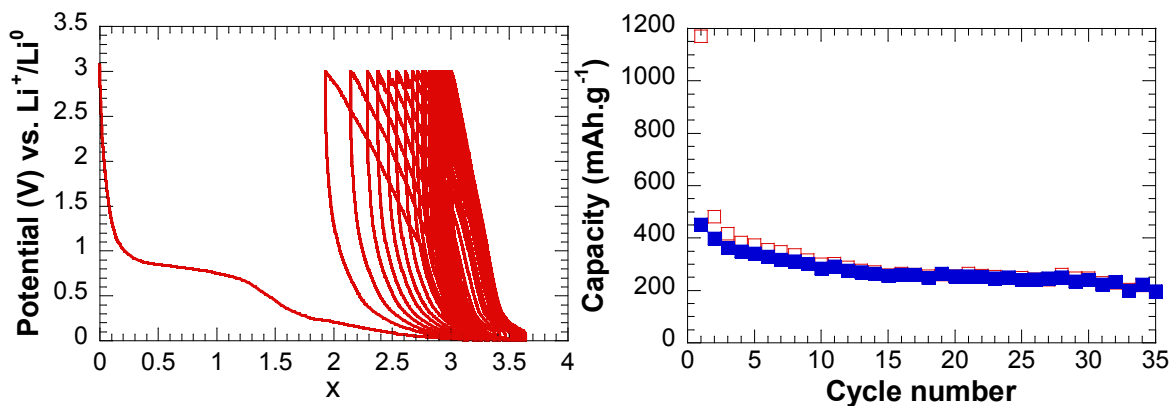

Figure SI-6. Potential/composition profiles of the pristine HSAG-500 carbon during 35 discharge/charge cycles.

The pristine HSAG graphite shows a rapid fading of the electrochemical capacity from approximately 400 mAh.g<sup>-1</sup> in the first cycle to almost stable reversible capacity of 200 mAh.g<sup>-1</sup> after 35 cycles.
